# 1 Extensive Phenomenological Overlap between Induced and 2 Naturally-Occurring Synaesthetic Experiences

---

3

4

David. J. Schwartzman<sup>a,b\*</sup>, Ales Oblak<sup>c</sup>, Nicolas Rothen<sup>d</sup>,

5

Daniel Bor<sup>e</sup> Anil. K. Seth<sup>a,b,f</sup>

6

<sup>a</sup>Sackler Centre for Consciousness Science, University of Sussex, Brighton, BN1 9QJ, UK

7

<sup>b</sup>Department of Informatics, University of Sussex, Brighton, BN1 9QJ, UK

8

<sup>c</sup>Centre for Cognitive Science, University of Ljubljana, 1000 Ljubljana, Slovenia

9

<sup>d</sup>Faculty of Psychology, Swiss Distance University Institute, 3900 Brig, Switzerland

10

<sup>e</sup>Department of Psychology, University of Cambridge, Downing Street, Cambridge, CB2 3EB, UK

11

<sup>f</sup>Canadian Institute for Advanced Research, Azrieli Programme on Brain, Mind, and Consciousness

12

\* Corresponding author

13

E-mail: [d.schwartzman@sussex.ac.uk](mailto:d.schwartzman@sussex.ac.uk)

## 14 **Abstract**

15

16 Grapheme-colour synaesthesia (GCS) is defined by additional perceptual experiences, which are

17 automatically and consistently triggered by specific inducing stimuli. The associative nature of GCS

18 has motivated attempts to induce synaesthesia by means of associative learning. Two recent studies

19 have shown that extensive associative training can generate not only behavioural (consistency and

20 automaticity) and neurophysiological markers of GCS, but also synaesthesia-like phenomenology

21 [1,2]. However, these studies provided only superficial descriptions regarding the training-related

22 changes in subjective experience: they did not directly assess how closely induced synaesthetic

23 experiences mirror those found in natural GCS. Here we report an extended qualitative analysis of

24 the transcripts of the semi-structured interviews obtained following the completion of the associative

25 training protocol used by [2]. In addition, we performed a comparable analysis of responses to an  
26 interview with a new population of natural occurring grapheme-colour synaesthetes (NOS), allowing  
27 us to directly compare the phenomenological dimensions of induced and naturally occurring  
28 synaesthetic experience. Our results provide an extensive addition to the description of the  
29 phenomenology of NOS experience, revealing a high degree of heterogeneity both within and across  
30 all experiential categories. Capitalising on this unique level of detail, we identified a number of  
31 shared experiential categories between NOS and induced synaesthesia-like (ISL) groups, including:  
32 *stability of experience, location of colour experience, shape of co-occurring colour experience, relative strength of*  
33 *colour experience and automaticity of colour experience.* Only the automaticity of colour experience  
34 differed significantly between the two groups: NOS experience was reported as being mostly  
35 automatic, whereas induced ISL were mostly described as being 'wilful'. We observed three  
36 additional experiential categories relating to the automaticity of synaesthetic experience within the  
37 NOS group: *contextually varied experience, semi-automatic experience and reflective association,* which  
38 suggests that, as with other experiential categories, the automaticity of synaesthetic experience is also  
39 highly heterogeneous. Our results provide new evidence that that intensive training of letter-colour  
40 associations can alter conscious perceptual experiences in non-synaesthetes, and that such alterations  
41 produce synaesthesia-like phenomenology which substantially resembles similarities to natural  
42 grapheme-colour synaesthesia.

43 *Keywords: synaesthesia, induced-synaesthesia, associative training, phenomenology, consciousness*

44

45

46

47

48

## 49 1.0 Introduction

50

51 In grapheme-colour synaesthesia (GCS), the presence of achromatic (black) letters (inducer) triggers  
52 the experience of colour (concurrent). The defining characteristics of GCS include the automaticity of  
53 the concurrent experience (i.e., not experienced as being under voluntary control), normally assessed  
54 using an adapted version of the Stroop task [3,4,5], and the consistency of the associations (i.e.,  
55 repeated presentations of an inducer will elicit highly similar concurrent experiences)[6,7,8].  
56 Typically, natural synaesthetes differ in the nature of their synesthetic experiences. Some grapheme-  
57 colour synaesthetes, referred to as *projectors*, experience their concurrent outside bodily space,  
58 'projected' into the world. Others, referred to as *associators*, report that their experiences exist within  
59 their internal mental space without any distinct spatiality [9,10,11]. A less frequently noted  
60 characteristic of GCS is that concurrent experiences usually lack what is called *perceptual presence* [12].  
61 This means that a concurrent experience is not usually confused with, or perceived as, a 'really-  
62 existing' property of the world. In GCS, even though an inducer elicits an additional colour  
63 experience (e.g., red), grapheme-colour synaesthetes will still perceive the inducer as being the colour  
64 it actually is (e.g., black).

65

66 The associative nature of GCS has led researchers to theorise that a learning component must be  
67 involved in the development of synaesthetic associations (for review see [13]). This has prompted a  
68 number of studies to investigate if it is possible to train non-synaesthetic (neurotypical) individuals to  
69 have synaesthesia-like experiences [1,2,4,14,15,16]. In two previous studies of this kind, we used  
70 extensive and adaptive associative training regimes towards this goal [1,2]. Using the gold-standard  
71 consistency test (Eagleman, Kagan, Nelson, Sagaram, & Sarma, 2007; Rothen et al., 2013;  
72 [www.synesthete.org](http://www.synesthete.org)), we found in both studies, that performance for trained letter-colour pairs  
73 passed the threshold indicative of synaesthetic experience. In addition, participants also displayed

74 synaesthesia-like behaviour for trained letters on a synaesthetic equivalent of the Stroop test  
75 (demonstrated by greater interference effects and slower response times in incongruent trials)[4,5].  
76 Critically, the majority of participants in the first study [1], and all participants in the second study [2]  
77 self-reported phenomenology suggestive of natural synaesthesia. However, these studies only  
78 provided relatively superficial descriptions of these training-induced changes in phenomenology.  
79  
80 In this study, we investigate in more detail the degree to which trained and natural synaesthetic  
81 experiences are similar. We report an in-depth qualitative analysis of the transcripts of the semi-  
82 structured interview obtained following the completion of the training protocol (data taken from [2]).  
83 We accompany this analysis with an equivalent analysis performed on interview transcripts obtained  
84 from similar semi-structured interviews obtained from a new sample of natural GCS subjects.  
85 Comparing these detailed phenomenological datasets, we provide a direct comparison between these  
86 two types of unusual perceptual experience.

87

## 88 **2.0 Material and Methods**

### 89 *2.1 Participants*

90 The Induced Synaesthesia-Like (ISL) group consisted of 18 non-synesthetes (15 women, mean age =  
91 23, SD = 3.08), whose data and interview recordings were taken from [2]. The Naturally Occurring  
92 Synaesthesia (NOS) group consisted of 15 grapheme-colour synaesthetes (14 women, mean age = 43.3,  
93 SD = 11.43). Experiments were undertaken with the understanding and written consent of each ISL  
94 participant. All NOS participants were recruited from the University of Sussex synaesthesia database  
95 based on indicative consistency scores of GCS ([www. synesthete.org](http://www.synesthete.org); [7]). Informed consent was  
96 obtained from NOS participants prior to the beginning of the interview. The experiment was  
97 approved by the University of Sussex ethics committee.

98 *2.2 Behavioural tests*

99 All participants completed the internet-based standardized grapheme-colour consistency test (www.  
100 synesthete.org; [7]). The test presents each participant with the graphemes A–Z three times in  
101 randomized order, for each presentation of a letter participants were asked to select the colour that  
102 best fit with each grapheme. The ISL group performed this test twice, once before and once upon  
103 completion of the training paradigm [2]. As part of their inclusion in the University of Sussex's  
104 synaesthesia database, all NOS participants completed the grapheme-colour consistency test (once).

105 *2.3 Phenomenological analysis*

106 Our research design was constructed around three related approaches in empirical phenomenology  
107 and qualitative research: two-phase research [17], sequential analysis [18] and theoretical sampling  
108 [19]. Based on these approaches, in Phase one, we gathered data from the ISL group that aimed at  
109 constraining our object of inquiry, so that in Phase two, we could acquire more precise and focused  
110 qualitative data from NOS participants. The order of the Phases was based on the historical  
111 dependencies between the two studies. The semi-structured interview used in [2] was carried out first  
112 and enquired about the core characteristics of synaesthesia (e.g., consistency, automaticity,  
113 unidirectionality etc.), which based on empirical evidence from NOS studies. This meant that the  
114 structure of the interview used in Phase two (with NOS participants) was very similar to that used in  
115 Rothen et al., (2018). Specifically, in the first Phase of the study, we conducted a semi-structured  
116 interview on participants from our training study [2]. Semi-structured interviews are particularly  
117 well-suited for investigating difficult-to-define experiences[2]. The manner in which the participant  
118 speaks and phrases particular responses can lead to a greater understanding of participant's  
119 experiences, while still allowing the participant the freedom to elaborate [20]. Based on ISL  
120 participant's subjective reports, we designed the second Phase of research, in which we gathered  
121 commensurable reports from individuals with naturally occurring GCS (the NOS group). In the  
122 following subsections, we present the protocol for each Phase of research.

123 *2.4 Phase 1: Subjective reports of induced synaesthesia-like experiences*

124 In the first Phase, following the completion of a 5-week training battery, all (ISL) participants  
125 performed a semi-structured interview designed to assess their perceptual phenomenology during  
126 exposure to 13 achromatic trained letters (for details see [2]). Due to the nature of our research  
127 questions, only sections of the interview that explicitly asked participants to describe their colour  
128 experiences were transcribed. These sections included responses to the question “Look at this page  
129 that has the 13 letters you have been trained over the last 5 weeks, to associate with 13 specific  
130 colours. I want you to describe any associated colour experience you have when looking at these  
131 letters”. Additionally, within the interview a subset of 14 participants were asked to compare the  
132 strength or vividness of their strongest trained synaesthesia-like colour experience (e.g. ‘r’ is red) to a  
133 life-long colour association of a real-world object (e.g. the specific shade of red associated with an  
134 English post-box).

135

136 Further, we constrained the focus of responses in a funnel-like structure frequently used in semi-  
137 structured interviews[21], by including responses and discussion to a forced choice question that  
138 required participants to localise their trained synaesthesia-like experiences in space. Question:

139 “Which statement characterises your grapheme-colour associations best?

140 Whenever I see a letter...

141 - There is only that letter, but no colour at all. I can't even think of an associated colour, no matter how  
142 hard I try.

143 - I know the associated colour, but I never see it.

144 - I see the colour in front of my mind's eye.

145 - I see the colour outside my head (i.e., a few inches away).

146 - I see the colour floating on the surface wherever the letter is.”

147

148 The interviews were transcribed following established methods of analysing subjective reports  
149 [22,23]. The analysis of the transcripts was carried out in two stages. First, the description of actual  
150 subjective experiences relevant to our line of enquiry were highlighted within the transcripts, while  
151 other descriptions (such as clarification about the question, or irrelevant discussion) were removed  
152 from the transcripts. We then performed a content analysis on the transcripts for all participants (N =  
153 18) (transcripts are available [https://osf.io/e367d/?view\\_only=dd61d42daa7a4c848023b89bd38789f8](https://osf.io/e367d/?view_only=dd61d42daa7a4c848023b89bd38789f8)).  
154 Experiences within the transcripts were then classified with respect to their specific content. We  
155 avoided using preconceived categories, instead allowing the categories and names for categories to  
156 emerge from the data [24].  
157  
158 The data was then analysed according to the principles of *content analysis*, whereby codes are not  
159 assigned to the data based on the concrete words used, but rather according to the underlying  
160 meaning [25]. We used inductive coding, meaning that we ascribed abstract, more general description  
161 to the raw data without recourse to established theoretical constructs [cf. 19]. This approach was  
162 chosen as it recognises that the knowledge gathered through interviews is jointly constructed by the  
163 researcher and participant, rather than being discovered in an observer-independent fashion, while  
164 still providing an established method for the analysis of qualitative data [26,27]. Following the logic of  
165 induction (i.e., moving from concrete raw data to more abstract, general descriptions), we assigned  
166 descriptive tags to the transcribed interviews. In doing so, we did not follow a pre-existing  
167 framework. Rather, we allowed experiential categories to emerge naturally from the experiential  
168 reports. Afterwards, we grouped specific codes together based on their structural (i.e., descriptive)  
169 similarities. Note that our coding system, while open-ended, was not assumption-free. We  
170 constructed a taxonomy of experiential categories such that it allowed for comparison of  
171 phenomenological dimensions of induced synaesthesia-like with naturally-occurring synaesthetic  
172 experiences. The validity of data acquisition and analysis was evaluated using two methods: a) *the*  
173 *annotated codebook* and b) *intercoder verification*. In qualitative research, the annotated codebook

174 approach [28] is an instrument that serves three purposes. Firstly, it is a way of organizing qualitative  
175 data by establishing meaningful relationships between individual reports. Secondly, a fully specified  
176 codebook (i.e., a codebook in which meaningful relationships between all the categories is  
177 established) provides a method for establishing that the gathered data is 'deep' enough for theory-  
178 construction [29,30]. Thirdly, it represents an instrument in which the coding process is described in  
179 sufficient detail to enable independent replication. The annotated codebook itself consists of two  
180 instruments: the saturation grid and the codebook itself. The saturation grid is a tabulation in which  
181 for each participant we note new instances of codes established from the interviews. Once we observe  
182 no new categories for an individual, conceptual depth has been achieved (also called saturation), and  
183 it is no longer necessary to conduct further interviews [31]. Table 1 displays a condensed version of  
184 the saturation grid for the ISL group (a fully specified saturation grid for the ISL group can be found  
185 in the supplementary materials). As can be seen in Table 1, conceptual depth was reached with  
186 participant 17: after this participant, no new codes were identified.

187

| Participants | 1 | 2 | 3 | 4 | 5 | 6 | 7 | 9 | 11 | 12 | 13 | 14 | 16 | 17 | 18 | 20 | 21 | 22 |
|--------------|---|---|---|---|---|---|---|---|----|----|----|----|----|----|----|----|----|----|
| New codes    | 9 | 3 | 1 | 2 | 0 | 1 | 1 | 0 | 0  | 0  | 1  | 0  | 0  | 1  | 0  | 0  | 0  | 0  |

188

*Table 1. Condensed version of a sample saturation grid for the ISL group.*

189

*Only participants included in [2] were used for analysis.*

190

191 The codebook was constructed according to standard approaches in empirical phenomenology [e.g.,  
192 32-34]. Each entry in the codebook is specified according to the following elements: name, description,  
193 subcategories, examples, and considerations. Considerations describe any specific differences  
194 between similar categories as well as concerns that may have emerged during the coding process (see  
195 supplementary materials for the full annotated codebooks

196

[https://osf.io/e367d/?view\\_only=dd61d42daa7a4c848023b89bd38789f8](https://osf.io/e367d/?view_only=dd61d42daa7a4c848023b89bd38789f8)). A second measure that was

197

used to ensure the validity of the analysis was intercoder verification. Two coders (DS and AO) coded



198 all transcripts independently and then compared their results for consistency [35]. Experiential  
199 categories were only identified and carried forward for analysis if identified by both coders.

## 200 2.5 *Phase 2: Subjective reports of naturally-occurring synaesthetic experiences*

201 In the second Phase of the study we collected additional data using a semi-structured interview from  
202 individuals with NOS. The interviewing protocol for the second Phase was constructed based on the  
203 findings from the first Phase; i.e., the interview guided participants towards observing and reporting  
204 on the main phenomenological dimensions that we observed in the transcripts from ISL experiences.  
205 Specifically, whenever the participants used language based on folk psychological theories or specific  
206 theories of synaesthesia, the interviewer used precise follow-up questions prompting the participants  
207 to describe their experience in more concrete terms. The interviews were conducted via video  
208 conference (Skype or WhatsApp). Audio was recorded using a dictaphone; video was not recorded.

209

210 The semi-structured interview followed a tripartite structure. First, we obtained general information  
211 about the nature of the participants' synaesthetic experiences, including questions relevant to the  
212 situational demands of the interview:

213

- 214 ☐ Have your synaesthetic experiences always been stable? Have they changed throughout the  
215 course of your life?
- 216 ☐ Do your synaesthetic experiences change depending on your mood, time of day, your level of  
217 fatigue?
- 218 ☐ Do your synaesthetic experiences change depending on whether you are reading text from a  
219 computer screen or a piece of paper?

220

221 We also collected demographic information and whether participants were professionally involved  
222 with academic mind-science disciplines, which may have led to theoretically-laden description of

223 experience (e.g. Psychology, Neuroscience). The second Phase also involved participants viewing 13  
224 graphemes, which were presented (via screen-share) individually in the same size and font as used in  
225 our training study [2], and they were asked to report on their associated colour experience. Following  
226 the presentation of each grapheme, they were asked to verbally identify the RGB code that best  
227 reflected their specific colour experience in relation to the grapheme, using an online colour picker  
228 (<https://htmlcolorcodes.com/color-picker/>). In this Phase, the participants also referred to the strength  
229 of the association between the grapheme and the colour on a scale from 1 to 10, with the weakest  
230 association being 1 and the strongest being 10. This section of the interview concluded with the  
231 participants having to report on the overall automaticity of their synaesthetic experience on a scale  
232 from 1 to 10, with 10 being fully automatic.

233

234 The third section of the interview examined participant's synaesthetic phenomenology in more detail  
235 by using a number of open-ended questions, as well as a specific mental exercise.

236 The open-ended questions were:

237

- 238 ☐ Can you describe the details of the colour experience (shape, letter, block etc.; precise location  
239 your synaesthetic experiences take place).
- 240 ☐ When looking at a letter, for instance, 'r', are you aware of both the actual colour of the letter  
241 on the page (black) and your synaesthetic colour experience? Or does one overlay the other?
- 242 ☐ Can you describe how your synaesthetic colour experience are similar/not similar to the  
243 colour of a real-world object?
- 244 ☐ Do your synaesthetic experiences change if the grapheme is capitalized or in a different font?
- 245 ☐ Are there any other types of experiences you have had in your life, which are similar to your  
246 synaesthetic experiences?

247 The mental exercise was:

248

249 ☐ Can you bring to mind a typical everyday colour association, such as *post-boxes are red* or the  
250 *sky is blue*. How is the experience of this colour association similar or different to your  
251 synaesthetic associations?

252

253 Finally, we asked the same forced choice question as with the ISL group, which required participants  
254 to localise their colour experience in space i.e. “Which statement characterises your grapheme-colour  
255 associations best?” Forced choice question options were the same as for the ISL group.

256

257 The audio recordings of the interviews were transcribed verbatim. Whenever participants referred to  
258 colour shades that were unfamiliar to the researcher by name, a picture of that colour was included in  
259 the transcript. If the participants referred to phonemes rather than graphemes, the audio in question  
260 was transcribed using the International Phonetic Alphabet. Subsequently, the transcripts from the  
261 NOS group were analysed using the same method as for the ISL group [18].

262

263 The validity of the data in the second Phase was established using the same methods as for Phase 1,  
264 through the construction of an annotated codebook and intercoder verification (DS and AO). Finally,  
265 as with ISL experience, we determined conceptual depth by constructing a saturation grid (Table 2),  
266 which revealed that we had reached saturation by participant NOS-10.

267

| NOS Participant | 1  | 2  | 3 | 4 | 5 | 6 | 7 | 8 | 9 | 10 | 11 | 12 | 13 | 14 | 15 |
|-----------------|----|----|---|---|---|---|---|---|---|----|----|----|----|----|----|
| New codes       | 11 | 10 | 2 | 1 | 1 | 3 | 2 | 0 | 1 | 1  | 0  | 0  | 0  | 0  | 0  |

268

*Table 2. Condensed version of saturation grid for the NOS group.*

269

270 Finally, a chi-square test of independence was performed to examine the relation between ISL and  
271 NOS groups for each experiential category. We only included commensurate values and excluded  
272 instances where no values could be induced from the raw data. This statistical comparison for each  
273 experiential category should be viewed as additional information to aid in the interpretation of  
274 qualitative findings, rather than a rigorous quantitative analysis.

275

### 276 **3.0 Results and Discussion**

277

278 In this study we applied a qualitative analysis of interview transcripts to provide a detailed  
279 description of both training Induced Synaesthesia-Like (ISL) and Naturally Occurring Synaesthesia  
280 (NOS) experiences, enabling us to directly compare these two types of perceptual experience. Our  
281 phenomenological analysis of the transcripts from both groups identified six main overlapping  
282 categories of experience. Transcripts of interviews as well as the annotated codebooks are available  
283 online [https://osf.io/e367d/?view\\_only=dd61d42daa7a4c848023b89bd38789f8](https://osf.io/e367d/?view_only=dd61d42daa7a4c848023b89bd38789f8).

284

285 Responses to questions about the nature of the NOS participants' synaesthetic experiences revealed  
286 that six out of the fifteen participants worked in mind-science areas, raising the possibility that their  
287 reports were informed by their theoretical knowledge about synaesthesia. Verifying that the  
288 situational context of the interview (video conference) did not affect their concurrent experience,  
289 responses to the question 'Do your synaesthetic experiences change depending on whether you are  
290 reading a text from a computer screen or a piece of paper?', revealed that the synaesthetic experiences  
291 of all participants (N=15) were not affected by the medium on which the grapheme was presented.

292

293 As described in our previous study [2], all ISL participants reported synesthetic phenomenology  
294 following completion of the training regime. Results of the grapheme-colour consistency test ([www](http://www).

295 synesthete.org; [7]) revealed that post-training consistency scores were on average below the  
296 established threshold value of 135 in CIELUV colour space, a level indicative of natural GCS (see top  
297 panel of Fig. 3C in [2]). Consistency results for the same test verified that all NOS participants were  
298 also below the threshold indicative of natural GCS ( $M = 76.53$  ;  $SD = 21$ ). In addition, all ISL  
299 participants also demonstrated letter-specific behavioural effects indicative of automaticity (e.g.,  
300 synaesthetic Stroop interference effect), which was further supported by reports that their  
301 synaesthesia-like experiences were automatic (assessed via forced-choice question).

302

### 303 **3.1 Identified phenomenological dimensions**

304 The main phenomenological dimensions that were constructed from the content analysis of the raw  
305 transcripts (verified by both coders) for the ISL group, which were used to compare and later  
306 observed in the NOS group were:

307

308 ☐ *Stability of colour experience.* This category describes the degree of within-subject variation in  
309 colour experience for each letter, including its strength and automaticity.

310 ☐ *Location of colour experience.* Within the transcripts we identified two levels of description  
311 referring to the location of the colour experience: the first, *location*, describes whether the  
312 colour experience takes place within the participants' mental space or is externally localised.

313 The second level of description is *location (specified)*, describes where in relation to the  
314 inducing stimulus the colour experience occurs.

315 ☐ *Shape of colour experience.* This category describes differences in the visual quality of the  
316 induced synaesthesia-like experience. In natural GCS variations exist in the precise visual  
317 qualities of the colour experience [36,37], such as discernible geometric shapes, letters, auras  
318 or as a totality of colour.

319 ☐ *Relative strength of colour experience.* This category refers to a specific mental exercise

320 participants were asked to perform during the interview. Participants were asked to bring to  
321 mind a strong real-world colour association (for example, the specific shade of red of an  
322 English post box). Importantly, the participants had to be aware of this association as  
323 something that remained stable throughout their lives. Then, during the mental exercise they  
324 were asked to compare their associated colour experience with this real-world colour  
325 association, and report how the two experiences compared to each other in terms of the  
326 strength and vividness of experience.

327 ☐ *Automaticity of colour experience.* This category refers to how automatically participants colour  
328 experience occurred. On the broadest level, automaticity refers to the distinction between  
329 colour associations being experienced as something that the participants need to actively  
330 invoke (coded as *willful*) and something that happens to them without any mental effort  
331 (coded as *automatic*).

332

## 333 **3.2 Comparisons of experiential categories between ISL and** 334 **NOS groups**

335 We now discuss the results of each experiential category, their relative similarities and differences,  
336 and the continuity between these reports and those found in the synaesthesia literature:

337

### 338 **3.2.1 Stability of colour experience**

339 This category describes a high-order description of induced-synaesthetic experience in terms of how  
340 varied the experience was for each participant across all presented graphemes. It encompasses aspects  
341 of experience, such as the vividness of the associated colour experience and how effortful it was to  
342 bring the colour experience into awareness and how these aspects of experience varied from

343 grapheme to grapheme. We highlight that the experiential categories, *location*, *shape* and *automaticity* of  
344 *colour experience* may also be evaluated with regards to *stability of colour experience*, but within the  
345 context of the interviews these categories were identified as separate dimensions of experience.

346

347 As is common in natural synaesthesia[37,38], the majority of ISL participants reported that their  
348 experience was *heterogeneous* (15 out of 17), displaying a high degree of variability in the strength and  
349 vividness of their synaesthesia-like colour experience associated with each letter i.e. in general, the  
350 letter 'r' produced a more vivid colour experience (red) than the letter 'u' (grey). Only two ISL  
351 participants reported a *homogenous* colour experience for all graphemes. For some graphemes, the  
352 synaesthesia-like colour association was reported as being automatic, whereas for other graphemes, it  
353 required mental effort to experience the associated colour (see Table 4).

354

355 We found a similar degree of variability within the phenomenological space of NOS participants. Ten  
356 NOS participants reported (N = 15) that their concurrent experiences were highly varied in terms of  
357 strength and automaticity between individual graphemes (coded as *heterogeneous*), with only 5  
358 participants reporting that their experiences were homogenous across all graphemes (see Table 4). A  
359 chi-square test of independence, found no significant difference between the ISL and NOS groups for  
360 this experiential category:  $\chi^2(1, N = 32) = 1.091, p = 0.296$ . Cramér's V measure of association,  $\phi_c$ , was  
361 0.185. In terms of the stability of synaesthetic experiences throughout their lives, eight NOS  
362 participants reported that their synaesthetic experiences had remained stable throughout their life.  
363 Four participants reported that they observed minor changes in synaesthetic experiences throughout  
364 their lives, including changes in the synaesthetic colour associated with single letters or words (e.g.,  
365 NOS-02 reports the word for *Saturday* shifted from blue to grey at the onset of adulthood), or  
366 variability in the intensity of synaesthetic colours (e.g., both NOS-11 and NOS-04 report that they  
367 sometimes worry that they may have "lost their colours"). Three participants reported more major  
368 changes in their synaesthetic experiences, describing that all of their synaesthetic colours had become

369 faded with age [cf. also 39]. The second dimension of stability of synaesthetic experience is whether  
370 the colour of their synaesthetic experience changes with context. Eight participants (N = 15) reported  
371 that their colours are present even during goal-oriented behaviour, such as reading. Conversely,  
372 seven participants reported that when reading, they were able to push their synaesthetic experiences  
373 out of their awareness.

374

375 Previous research has shown that the letter–colour associations of synaesthetes are not random, but in  
376 fact display some structure [40]. In both of our previous training studies, the  
377 letter–colour associations chosen for training were based on their prevalence in synaesthetic and non-  
378 synaesthetic populations. Within natural synaesthesia, the majority of these letter–colour associations  
379 displayed a clear semantic association (e.g. r = red)(see Fig 3, [40]; also [1]). In our first training study,  
380 we found that even before training, letter–colour pairings that exhibited a strong semantic association  
381 caused a significant Stroop interference effect. Following training, Stroop interference effects  
382 increased, but were almost entirely driven by those letters that exhibited a clear semantic association  
383 [Fig 1, 1]. In addition, we found that synaesthesia-like colour experiences were particularly strong for  
384 those letter–colour associations that involved the same semantic component [1]. These observations  
385 raise the possibility that conceptual associations may facilitate the development of at least some  
386 letter–colour associations in natural synaesthesia, which in turn, may explain why they were so  
387 successful in driving synaesthesia-like behaviours and phenomenology in our training studies.

388

### 389 **3.2.2 Location of colour experience**

390 Within this category we constructed two levels of description. The higher-order level of description  
391 (referred to as *location*) describes whether the participants colour experience was located within their  
392 mental space or if it was externally localised. The lower-order level of description (*location (specified)*)  
393 describes the location of the colour experience in relation to the grapheme: *letter-adjacent*, denotes



394 situations in which the colour was experienced proximal to the letter; conversely, *letter-overlapping*  
395 describes the associated colour experience occurring precisely over the letter.

396 ***Location***

397 For the category *location* we found that, as reported in NOS [41,42], the ISL group differed  
398 substantially in the description of the location of their synaesthesia-like experience. Some (9 out of 17  
399 ISL participants) reported their synaesthesia-like experience as occurring in external space (*projector-*  
400 *like*), whereas others (8 out of 17 ISL participants) reported them as occurring within their “mind’s  
401 eye” (*associator-like*). Responses to the forced choice question: “Which statement characterises your  
402 grapheme-colour associations best?” revealed a slightly different picture (see Table 3), which may be  
403 due to the constrained nature of the forced choice questioning. 12 out of 18 ISL participants reporting  
404 their synaesthesia-like experience occurred in front of their “mind’s eye”, and the rest reporting that  
405 they occurred ‘floating on the surface wherever the letter is’.

406

407 Within the NOS group, we found fewer projector-like descriptions (3 out of 15), with the majority (12  
408 out of 15) describing their concurrent experience as occurring within their *mental space* (see Table 4).  
409 This finding was supported by responses to a forced choice question that required participants to  
410 localise their synaesthetic experiences in space (see Table 3). As responses to the forced choice  
411 question were taken in the context of a face-to-face interview, NOS participants had the opportunity  
412 to elaborate on their answers. The table therefore contains two counts: *primary* and *secondary features*  
413 for individuals with NOS. Primary feature represents the count of their typical experiences, whereas  
414 the secondary feature represents experiences that may happen (usually qualified in the interviews  
415 with phrases “It happens sometimes,” or “It happens in specific circumstances”).

416

| Forced choice statement | ISL:<br>Responses | NOS: Primary<br>response | NOS: Secondary<br>response |
|-------------------------|-------------------|--------------------------|----------------------------|
|                         |                   |                          |                            |

|                                                                                                                                                 |    |    |   |
|-------------------------------------------------------------------------------------------------------------------------------------------------|----|----|---|
| Whenever I see a letter, there is only that letter, but no colour at all. I can't even think of an associated colour, no matter how hard I try. | 0  | 0  | 0 |
| Whenever I see a letter, I know the associated colour, but I never see it.                                                                      | 0  | 2  | 2 |
| Whenever I see a letter, I see the colour in front of my mind's eye.                                                                            | 12 | 11 | 0 |
| Whenever I see a letter, I see the colour outside my head (i.e., a few inches away).                                                            | 0  | 0  | 2 |
| Whenever I see a letter, I see the colour floating on the surface wherever the letter is.                                                       | 6  | 2  | 4 |

417 *Table 3. Absolute frequencies of forced-choice responses to the question "Which statement characterises your*  
 418 *grapheme-colour associations best?" for ISL and NOS groups.*

419 A chi-square test of independence, found no significant difference between the ISL and NOS groups  
 420 for the experiential category *location*:  $\chi^2(1, N = 32) = 2.418, p = 0.120$ . Cramér's V measure of  
 421 association,  $\phi_c$ , was 0.275.

422 *Location (specified)*

423 Within this category, we found a large degree of heterogeneity for both groups when describing the  
 424 precise location of their colour experiences. In reports where this information was available,  
 425 approximately half of the ISL participants (7 out of 13) described their colour experience as  
 426 overlapping with the grapheme, the others (6 out of 13) described it as occurring near or around the  
 427 grapheme.

428

429 Within the NOS group we observed two cases ( $N = 7$ ) of *letter-adjacent* colour experience, and five  
 430 cases of *letter-overlapping* colour experiences (i.e., the colour experience was described as occurring

431 precisely over the grapheme). However, for the remaining NOS participants we identified an  
432 additional experiential category that was not present in the ISL group, in which the location of  
433 concurrent experience could not be discerned, because the colour experiences were tied to vague  
434 descriptions that occurred in the participant's mental space. These participants described their  
435 synaesthetic experience as containing a component (N = 6) or consisted solely (N = 1) of propositional  
436 knowledge of the grapheme-colour association. In other words, the participants *knew* the concurrent  
437 colours without being able to localise them in space [10; 43]. Finally, one participant (NOS-04),  
438 reported experiencing an embodied connection to the concurrent colour, such that she experiences  
439 her concurrent through her body. A chi-square test of independence, found no significant difference  
440 between the ISL and NOS groups for the experiential category *location (specified)*:  $\chi^2(1, N = 21) = 0.257$ ,  
441  $p = 0.612$ , Cramér's V measure of association,  $\phi_c$ , was 0.111.

442

443 On first inspection reports from both groups appear to support the associator/projector subtype  
444 distinction. However, a more detailed examination of reports from the NOS group reveal a more  
445 complicated picture. Four aspects of reported experience challenge this distinction. First, unlike  
446 classic descriptions [42], in the NOS group we observed a number of individuals in which both  
447 associator and projector phenomenology co-occurred (8 out of 15) (for a similar finding, see [36]). For  
448 example, consider the following report:

449

450 Participant NOS-12: ... The colours become even more intense if I'm tired. If I'm super  
451 caffeinated. And I can become more of a projector and less of an associator during those  
452 experiences. Like if my brain is frazzled, all of a sudden, I am a projector, and not an  
453 associator.

454

455 This duality is quite apparent in Participant NOS-08. On the one hand, her synaesthetic experiences  
456 may take the form of an awareness of colour inside her mental space:

457

458 Participant NOS-08: They are in my head. They are sort of in the middle. The colours for the  
459 alphabet, they, or with words, they are sort of in the middle of my head there but down. So,  
460 behind my eyes, and in the middle of my brain. And how I see it, it's all black in my brain. It's  
461 like black, with just the words in the middle inside of my head. And I'm reading it, sort of,  
462 left to right. I see them as I would on the page.

463

464 However, under specific circumstances (in this case reading), these colour experiences are reported as  
465 occurring in external space:

466

467 Participant NOS-08: I am basically sitting, this is my son's bedroom, these are his  
468 bookshelves. Some of his bookshelves. And I am actually looking at some words here, all the  
469 time. And so, [pause] I am looking at *Civil War* – He's a historian – [laughs] where it says *Civil*  
470 *War*, obviously I can see it written in red. But then in my head, it's going green, white, brown,  
471 white, white, it's going green, yellow, brown. In my head. It's almost like I can read it.  
472 Obviously, I can see it. But it's not changing in front of me. It's not changing on the book  
473 spine. It's in my head. I translated it into colour.

474

475 Researcher: Yeah. [...]. Are you aware of these two separate colours of the actual red of the  
476 title and then of your synaesthetic experience, are you aware of them simultaneously or do  
477 you switch between the two?

478

479 Participant NOS-08: I switch. I sort of, I can, oh, no, actually, when I am looking at it there, it's  
480 going green, the C is going green in my head as I am looking at it there. Obviously, I'm aware

481 of the red, and I'm reading it in red, but then it's going into colour in my head. I know that  
482 sounds so bizarre.

483

484 Conversely, participant NOS-03 reports that when external stimuli appear spontaneously or take him  
485 by surprise, his synaesthetic experience was described as occurring in the *outside world*, but when  
486 elicited in the artificially constrained environment of the interview, his concurrent experience was  
487 described as residing within his mental space.

488

489 Second, for some NOS participants (7 out of 15) the synaesthetic experience contained a component  
490 (6) or consisted solely (1) of propositional knowledge of the grapheme-colour association. In other  
491 words, these participants *knew* the associated concurrent colour without being able to localise it in  
492 space. Others have described this instantiation of GCS as 'know-associator', that is, such synaesthetes  
493 simply know the colour associated with each letter but do not have a visual representation of it  
494 [36,43]. This non-perceptual subtype, does not fit within the subtype classification (even though these  
495 participants display consistency for letter-colour pairings), and may reflect a weak form of  
496 synaesthesia, in which, the perceptual concurrent experience has faded over time, but the associative  
497 aspects remain.

498

499 Third, within cases that described their grapheme-colour associations as propositional knowledge,  
500 five out of the six NOS participants described their concurrent phenomenology as consisting of  
501 multiple streams of experience. Rather than being aware of a concrete colour, the participants  
502 experienced a vague awareness or a feeling of a colour. This finding is in line with previous research,  
503 which also found that some synaesthetes could not easily describe their concurrent experience [36].  
504 Again, these descriptions present difficulties when attempting to place them within the projector-  
505 associator continuum.

506

507 Finally, one participant (NOS-04), reported experiencing an embodied connection to the concurrent  
508 colour. Her description implies an active participation in attending to the colour such that she  
509 experiences her concurrent through her body (matching what has been referred to as *attentional*  
510 *dispositions*, [34,44] and *existential orientation* [45] in phenomenological literature; and *overarching states*  
511 *of mind* in neuroscientific literature [46]. Again, this description falls outside of the classical subtype  
512 classification.

513

514 Together, the results of the experiential categories *location* and *location (specified)* demonstrate that  
515 similar to NOS, ISL experiences were reported to occur either in external space (*projector*), or within  
516 their “mind’s eye” (*associator*). In terms of the specific location of colour experience (*location*  
517 (*specified*)), the majority of both groups described them as occurring either adjacent to, or overlapping  
518 with the letter. However, within the NOS group, we discovered an additional category of experience,  
519 in which the location of concurrent experience could not be discerned. A detailed examination of  
520 reports from the NOS group for these categories revealed a number of aspects of experience which  
521 are at odds with the subtype classification. Results from these experiential categories, combined with  
522 previous work [11,36,47], suggests that while initially useful as a tool for dividing synaesthetes into  
523 subgroups, the project-associator distinction may require evolving into a more nuanced  
524 phenomenological space.

525

### 526 **3.2.3 Shape of colour experience**

527 This experiential category describes the shape or form associated with the colour experience reported  
528 by participants. All of the ISL and the majority of the NOS group described the same three forms of  
529 colour experience for this category, reporting that either their colour experience mirrored the shape of  
530 the grapheme (ISL: 7 out of 14; NOS: 8 out of 15) (coded as *letter*), that their associated colour  
531 experience had a *discernible geometric shape* (e.g., a block of colour) (ISL: 3 out of 14; NOS: 1 out of 15),

532 or that their colour experience exhibited a shapeless presence of colour or an *aura* (ISL: 4 out of 14;  
533 NOS: 6 out of 15)(the participants' entire mental space was filled with the awareness of the associated  
534 colour)(see Table 4). In terms of the specific shape of synaesthetic colour experience, we identified  
535 two additional experiential categories within the NOS group. Specifically, a distinction was  
536 established between cases where colour experiences were explicitly described as having no shape  
537 (coded as *none*; N = 4) and a single case in which the participant described the colour experience as  
538 taking up the whole of their mental space (*totality of colour*), with it becoming part of their sense of  
539 embodiment. We note that values for the category *shape* may overlap; i.e., an individual may associate  
540 one letter with a specific shape and another letter with a different shape. Thus, we observed one case  
541 where the shape of the letter co-occurred with the shape of an aura, and one case where it co-occurred  
542 with totality of colour. A chi-square test of independence, found no significant difference between the  
543 ISL and NOS groups for this experiential category:  $\chi^2(2, N = 22) = 1.228, p = 0.541$ . Cramér's V  
544 measure of association,  $\phi_c$ , was 0.236.

545

### 546 **3.2.3 Relative strength of colour experience**

547 This category refers to a specific mental exercise participants were asked to perform during the  
548 interview, in which they were asked to compare the vividness of their strongest trained/natural  
549 synaesthetic colour experience to visual imagery associated with a life-long colour association of a  
550 real-world object (e.g. the specific shade of red associated with an English post-box). We created three  
551 values to describe the strength of synaesthesia-like experience: *weaker than non-synaesthetic colour*  
552 *association, stronger than non-synaesthetic colour association, and equal to non-synaesthetic colour*  
553 *association*. However, we note that the strength values of synaesthesia-like experience may overlap, as  
554 we found that experiences in both groups displayed a high degree of heterogeneity from grapheme to  
555 grapheme.

556

557 Following the mental exercise, the majority of participants in both groups reported their associated  
558 synaesthetic/synaesthesia-like colour experience as being equal to or weaker than visual imagery  
559 associated with a non-synaesthetic colour association (ISL: 11 out of 16; NOS: 11 out of 15). Five ISL  
560 and two NOS participants reported that their synaesthetic experience was stronger than visual  
561 imagery associated with a life-long colour association (see Table 4). Interestingly, NOS participants  
562 frequently reported that there was no qualitative difference between their synaesthetic experience  
563 and visual imagery of a real-world colour association, for example:

564

565         Researcher: *Bananas are yellow* is okay. Compare that colour association with *red is rusty brown*,  
566         or sorry, *R is rusty brown*. [...] How are these two statements similar or different in your  
567         experience?

568

569         Participant NOS-10: They are pretty much exactly the same, to be honest. [pause] There's no  
570         difference. Bananas will always be yellow, and R is always going to be rusty brown.

571

572 Findings for this experiential category may be interpreted as suggesting an equivalence between  
573 visual imagery and synaesthetic experience. Indeed, ever since synaesthesia was first described,  
574 debate has continued over whether synaesthetic experiences should be viewed as distinct from vivid  
575 mental imagery [48,49,50]. Some synaesthetic experiences are described as occurring within the  
576 “mind’s eye”, which is evidently similar to descriptions of visual mental imagery. Nonetheless,  
577 phenomenological differences exist between these two forms of perception. For example, in projector  
578 variants of GCS, the concurrent experience is described as being externally localised, whereas visual  
579 imagery is normally reported as occurring within the “mind’s eye”. In addition, visual imagery is also  
580 associated with a sense of volition, whereas a widely agreed hallmark of the synaesthetic concurrent  
581 experience is that they are automatically triggered by specific inducing stimuli [37]. We will return to  
582 this point shortly.



583

### 584 **3.2.4 Automaticity of colour experience**

585 This category of experience refers to whether the colour experience was described as being *automatic*  
586 (i.e., experienced as if it happened to the participants) or *wilful* (i.e., experienced as if it was performed  
587 by the participants). In our previous training study, we reported that 12 out of 18 ISL participants  
588 indicated that the translation from letter to colour did not require any effort, 3 out of 18 were  
589 undecided and 3 out of 18 said the translation required effort [2]. In contrast, to these findings, our  
590 qualitative analysis revealed that for the majority of ISL participants (9 out of 14) their synaesthesia-  
591 like experience required mental effort to occur, with only five cases reporting that the experience was  
592 automatic. A possible explanation for this divergence relates to the different prompts (open-ended vs.  
593 closed-form) used to assess automaticity, which may have led participants to provide an answer  
594 based on different aspects of their experience [e.g.51,52]. In our original training study automaticity  
595 was assessed by asking participants: 'Does it require mental effort from your side, in order to have  
596 these experiences?'. By contrast, the results of this experiential category were based on an analysis of  
597 each participants entire interview (data here  
598 [https://osf.io/e367d/?view\\_only=dd61d42daa7a4c848023b89bd38789f8](https://osf.io/e367d/?view_only=dd61d42daa7a4c848023b89bd38789f8)).

599

600 Using the same qualitative analysis, in contrast to the ISL group, we found that the majority of NOS  
601 participants (8 out of 15) described their synaesthetic colour experience as fully automatic (see Table  
602 4). This result was confirmed using a forced choice question, in which participants rated the  
603 automaticity of their synaesthetic experience from 1-10, 10 being fully automatic; the average score  
604 across all participants was 8.99 (N = 15, SD = 1.62). We found that only one participant described their  
605 synaesthetic colour experiences as being *wilful*, i.e. they needed to be wilfully brought to the front of  
606 their awareness.

607

608 This divergence in experience between the two groups was highlighted by a chi-square test of  
609 independence, which identified a significant difference between the ISL and NOS groups for the  
610 experiential category *automaticity*:  $\chi^2(1, N = 24) = 4.934, p = .026$ . Cramér's V measure of association,  
611  $\phi_c$ , was 0.453. In reference to the category *stability of experience*, it needs to be restated that the  
612 automaticity of letter-colour associations varied from grapheme to grapheme.

613

614 While the ISL group only reported on the distinction between *wilful* and *automatic* experiences, we  
615 identified three additional aspects of NOS experience for this category. The first is *contextually varied*  
616 *experience*, which describes individuals whose synaesthetic experiences displayed different levels of  
617 automaticity based on their immediate situation. For example, we found three NOS participants who  
618 reported that while reading prose, were able to ignore their synaesthetic experiences, and three  
619 participants whose synaesthetic colours were dependent on the context in which they were viewed.

620

621 The second additional experiential category identified within the NOS group is *semi-automatic*  
622 *experience*, which refers to situations in which participants experience the option of bringing their  
623 concurrent experience to the forefront of their awareness or to block it from occurring at all. We  
624 observed two cases of individuals who reported *semi-automatic* experiences. Consider the following  
625 report:

626

627 Participant NOS-04: I don't focus in on the colour quite as much as if I am focusing on it. So,  
628 to say, like, for example, I am reading a novel. I don't focus on the colours that are there. So,  
629 they become sort of pushed back out of my conscious thought until I individually think of a  
630 letter.... It's a background noise type thing.

631

632 The third additional experiential category we identified is named *reflective association*. This category  
633 describes reports of colour experiences only become present in the participants' awareness when they

634 consider a given grapheme, or when they reflect on the letter itself. If they do not assume this  
635 reflective stance, no synaesthetic experience occurs. Surprisingly, similar to reports from the ISL  
636 group that their colour experience required mental effort, we found codes referring to the *reflective*  
637 nature of concurrent experiences in the majority of NOS participants (10 out of 15).

638

639 The category *reflective association* contains two values: *phase-in* and *phase-out*. The former describes  
640 situations in which participants perform a mental gesture in order to bring the synaesthetic  
641 experience to the forefront of their awareness, as in the following example:

642

643 Participant NOS-05: So, this, and perhaps I don't have the right kind of synaesthesia for you.  
644 I don't *see* the colour when I look at the word on the page. But when I envision a letter in my  
645 mind, it has a colour. Words in my mind have a colour, and certainly days of the week and  
646 numbers very strongly have a colour. But if I look at your list, I don't see the colours when I  
647 see the letters.

648

649 As well as the following:

650

651 Participant NOS-06: I'm only aware of it ... if I'm reading, there are no colours at all, I'm just  
652 reading. If I stop for a moment and think about synaesthesia ... if someone says ... or if my  
653 mind drifts from the reading to synaesthesia, then I can see letters. They are kind of there all  
654 the time. I can see them if I want to. The colours are there. I can see that it's black. It's just  
655 black. The text. But if I want to see the colours, they will pop up in a way, but it's different in  
656 a way, because I am physically seeing the black letters, and I am mentally seeing the colours.  
657 Because it happens so automatically – that's it! It's the synthesized bit of synaesthesia, in that  
658 it is so automatic that I am imagining the colour, it's not in the imaginary visualization way,  
659 because it's just there and I can tap into my brain or not. And most of the time, I never do.

660 Conversely, the value *phase-out* refers to the mental gesture whereby participants move their  
661 synaesthetic experience to the back of their mind (see excerpt from participant NOS-04, above).

662 If they did not assume this reflective stance, no synaesthetic experience was reported.

663

664 Similar reports of mental action altering perceptual experience have also been described in other  
665 forms of synaesthesia, such as sequence-space synaesthesia. In a single case study, the concurrent  
666 experience was described as occurring within a “mental room”, with the participant reporting the  
667 ability to selectively shift their attention to either the mental room in which the concurrent occurred,  
668 or to the real world (Gould, et al., 2014). Within the NOS group we identified seven participants who  
669 reported a similar ability: while reading prose, they were able to ignore their synaesthetic  
670 experiences, pushing them to the back of their mind.

671

672 The identification of this experiential category *reflective association* suggests that, for most NOS  
673 participants, an inducer must be attended to in order to elicit a concurrent experience. This finding is  
674 in line with previous work, which suggests that attention must be deployed to a grapheme for the  
675 associated colour experience to emerge [36,53-56]. Indeed, a key feature of the description of  
676 automaticity in relation to concurrent experience is that an inducer must be sufficiently processed to  
677 elicit a concurrent experience. For example, within a visual search task, in which a target digit was  
678 presented within an array of distractors, both synaesthetes and matched-controls were shown to be  
679 equally inefficient at locating the target when the target and distractors were achromatic, despite the  
680 same digit eliciting a distinct colour experience for the synaesthetes when presented outside of the  
681 search task [54,56]. The authors suggest that synaesthetic colour experience does not arise early  
682 enough in visual processing to attract focal attention. In addition, other studies have shown that  
683 reducing the available attentional resources when processing an inducing stimulus significantly  
684 reduces synesthetic interference effects, within a modified Stroop task [53,54]. These findings  
685 collectively suggest that the concurrent experience requires attention to be focused on an inducer in

686 order to occur. However, the precise meaning of ‘sufficiently processed’ is unclear and open to  
687 interpretation, if it refers to a participant being consciously aware of the stimulus, then our findings  
688 differ from the literature, as some participants reported being aware of a letter, but needed to further  
689 reflect on its associative aspects to elicit a concurrent experience. Based on the subjective reports of  
690 the majority of our NOS participants, the category *reflective association*, supports the notion that in  
691 addition to inducers requiring selective attention, they also need to be considered in order for them to  
692 elicit a synaesthetic colour experience. Further research is required to validate if this particular aspect  
693 of synaesthetic experience extends to a wider GCS population.

694

695 The results of the chi-square test suggests that a distinguishing aspect of experience between ISL and  
696 NOS groups is that NOS experiences are subjectively perceived to occur automatically, whereas ISL  
697 experiences are generally reported as being wilful. However, the category *reflective association* leads to  
698 an apparent contradiction in our data, namely, for NOS participants the closed-form questions point  
699 to concurrent experiences being automatic, while the qualitative data suggests that for the majority of  
700 participants they are experienced as being wilful. How can we explain this contradiction in our data?  
701 One possibility is that, similar to the ISL group, the different prompts (open-ended vs. closed-form)  
702 lead the participants to provide an answer based on different aspects of their experience [e.g. 51]. The  
703 open-ended questions (within the context of the interview) may have been interpreted as enquiring  
704 about the awareness of colour in their visual consciousness, whereas the closed-form measures may  
705 have been interpreted as referring to their propositional knowledge about the grapheme-colour  
706 association. For example, the associative link between ‘R’ and ‘red’ may be automatic in a participant’s  
707 experience, whereas the visual experience of redness elicited by the letter ‘R’ seems to be associated  
708 with the reflection on the letter itself.

709

710 Observations from this experiential category also speaks to the relationship between synaesthetic  
711 experience and visual imagery. As previously mentioned, a key distinction between these two forms

712 of perception is volitional control, - a defining characteristic of synaesthetic experiences is its  
713 automaticity, while visual imagery usually exhibits an element of volitional control. However, we  
714 found that some NOS participants reported volitional control over their synaesthetic experience.  
715 Additionally, the majority of NOS participants reported that their concurrent experience only  
716 occurred following a volitional *reflective association*. We acknowledge that visual imagery is a complex  
717 and flexible phenomenon; that likely consists of many components [57]. However, reports of NOS  
718 participants in our study provides tentative evidence that for some synaesthetes their concurrent  
719 experience exhibits a degree of volitional control, which appears similar to visual imagery [58].

720

721 Finally, individual variation in the vividness of visual mental imagery in the general population has  
722 been well documented [58,59]. We note that reports from both ISL and NOS participants displayed  
723 individual variations in the vividness of their concurrent experience. This raises the question, if  
724 variations in visual mental imagery could account for individual differences in the reported vividness  
725 of synaesthetic concurrent experiences observed in this study? Indeed, grapheme-colour synaesthetes  
726 have been shown to display more vivid visual imagery compared to matched controls [60]. A finding  
727 which has led some researchers to conclude that there must be a continuum of experience in GCS,  
728 from those who never have a visual experience of a concurrent (possibly reflected by the non-  
729 perceptual subtype) to those individuals who always enjoy a vivid conscious concurrent [49]. We did  
730 not explore variations in visual mental imagery within our NOS participants; future work is  
731 warranted to examine if variations in visual mental imagery affects the reported vividness of  
732 concurrent colour experience.

733

734 To aid in the interpretation of results, Table 4, summarises the frequency distribution of  
735 phenomenological dimensions between the ISL and NOS groups.

736

| Phenomenological dimensions of ISL and NOS experience |        |                                |                             |                                  |                |      |    |
|-------------------------------------------------------|--------|--------------------------------|-----------------------------|----------------------------------|----------------|------|----|
| Stability of experience                               | Value  | Heterogeneous                  | Homogenous                  | NA                               |                |      |    |
|                                                       | f(ISL) | 15                             | 2                           | 1                                |                |      |    |
|                                                       | f(NOS) | 10                             | 5                           | 0                                |                |      |    |
| Strength of association                               | Value  | Weaker than colour association | Equal to colour association | Stronger than colour association | NA             |      |    |
|                                                       | f(ISL) | 6                              | 5                           | 5                                | 5              |      |    |
|                                                       | f(NOS) | 3                              | 5                           | 2                                | 2              |      |    |
| Location                                              | Value  | Outside location               | Mental space                | NA                               |                |      |    |
|                                                       | f(ISL) | 9                              | 8                           | 1                                |                |      |    |
|                                                       | f(NOS) | 3                              | 12                          | 0                                |                |      |    |
| Location (specified)                                  | Value  | Letter-adjacent                | Letter-overlapping          | NA                               |                |      |    |
|                                                       | f(ISL) | 6                              | 7                           | 5                                |                |      |    |
|                                                       | f(NOS) | 2                              | 6                           | 5                                |                |      |    |
| Shape                                                 | Value  | Letter                         | Discernible shape           | Totality of colour               | Aura           | None | NA |
|                                                       | f(ISL) | 7                              | 3                           | 2                                | 2              | /    | 4  |
|                                                       | f(NOS) | 8                              | 1                           | 1                                | 3              | 4    | 0  |
| Automaticity                                          | Value  | Willful                        | Automatic                   | Varied                           | Semi-automatic | NA   |    |
|                                                       | f(ISL) | 10                             | 5                           | /                                | /              | 3    |    |
|                                                       | f(NOS) | 1                              | 8                           | 3                                | 2              | 0    |    |

737 *Table 4. Frequency distribution of phenomenological dimensions associated with ISL and NOS experience. The*

738 *symbol “/” represents values that were not induced from the data in that specific group.*

739

### 740 **3.3 Implications for synaesthesia research**

741 Our phenomenological analysis of the NOS group raises a series of points for discussion regarding

742 the core definitional characteristics of natural synaesthesia, which we now consider in terms of its

743 internal consistency, automaticity and spatial characteristics [7,10,37,61].

744

745 The consistency of synaesthetic experience has become the behavioural 'gold standard' for  
746 determining the genuineness of the condition, being described by some as a fundamental  
747 characteristic of synaesthesia [11]. Using the colour-consistency test for the behavioural diagnosis of  
748 synaesthesia [7] our previous training studies, including the participants reported on here, found that  
749 trained graphemes demonstrated levels of consistency indicative of synaesthetic experience [1,2].  
750 These results suggest that, while a useful indication of natural synaesthesia, consistency cannot be  
751 viewed as unique to naturally occurring synaesthesia. Indeed, debate exists around the validity of  
752 consistency as a diagnostic criterion in synaesthesia research. For example, Simner et al., [62] found  
753 that not all synaesthetes meet the criteria of consistency even though they feel strongly that they  
754 experience the condition, and also noted that some synaesthetes reported that their concurrent  
755 experiences were never consistent. Some have argued that the criterion of consistency over time  
756 provides a circular definition; that is, it fits the profile of synaesthesia described in the literature  
757 precisely because this group has been selected based on this criterion [41,63]. It is possible that studies  
758 investigating synaesthesia have been self-selecting a biased sample of consistent synaesthetes, while  
759 claiming that consistency is a defining feature of this condition.

760

761 A wealth of contemporary studies have described the automaticity of synaesthetic experiences, i.e. a  
762 concurrent experience is automatically triggered by an inducer and is not under voluntary control, as  
763 another hallmark of the condition, which is normally assessed using an adapted version of the Stroop  
764 task [4,5]. We found, using subjective reports, that the majority of NOS participants reported a need  
765 to selectively attend to the inducing stimulus in order for a concurrent experience to be elicited. This  
766 finding is in line with previous research [8,36,53,54,55,56]. However, we found that the majority of  
767 NOS participants also needed to 'reflectively consider' the inducer, in addition to paying attention, to  
768 elicit a concurrent experience. We also found that three NOS participants reported that while reading  
769 prose they were able to ignore their synaesthetic experiences. How do these findings fit within the



770 wider synaesthesia literature? A key feature of the description of automaticity in relation to  
771 concurrent experience is that an inducer must be sufficiently processed to elicit a concurrent  
772 experience. However, this description is open to interpretation, if sufficiently processed refers to a  
773 participant being consciously aware of the stimulus, then our findings differ from the literature. This  
774 difference is highlighted by some participants not experiencing a synaesthetic concurrent in  
775 circumstances where this would be undesirable (e.g., reading prose), even though they are  
776 consciously aware of the inducer. If, on the other hand, sufficiently processed refers to paying close  
777 attention to the inducing stimulus (i.e., focusing attention to the stimulus and its associations), then  
778 our findings are in line with previous research.

779

780 In standard terminology, natural synaesthetes have often been characterised along a projector to  
781 associator continuum [3]. In both ISL and NOS groups, some participants indeed reported that their  
782 concurrent occurred within their mind's eye, while others indicated that it appeared in external space.  
783 However, we found that some NOS participants reported both types of description, while others  
784 stated that there was no specific spatiality associated with their concurrent experience. Therefore,  
785 while our results suggest that some synaesthetic experience may be spatially localised, we found  
786 other variants that lacked a defined spatial location. Our findings suggest that there is no clear  
787 rationale for future studies to subdivide synaesthetes simply based on the spatial location of their  
788 concurrent experience.

789

790 The comparisons between induced and natural synaesthesia described in this paper cast further  
791 doubt to the claim that natural synaesthetic phenomenology can only occur in a rare subset of the  
792 population that exhibit a genetic predisposition [38,64,65]. Even in cases where a genetic  
793 predisposition leads to the development of synaesthesia, the observation that in most forms of  
794 synaesthesia concurrent experiences are triggered by cultural artefacts, suggests that natural  
795 synaesthesia must include a substantial dependence on learning and prior experience [1,2,13,66,67].

796

### 797 **3.4 Limitations and future directions**

798 The phenomenological descriptions reported here are by no means exhaustive, particularly with  
799 regards to naturally occurring synaesthesia (NOS). Indeed, even within the present set of transcripts,  
800 additional experiential themes and categories were identified, which remain to be fully explored.

801

802 Among these additional categories, *veridicality*, is an aspect of experience that describes if participants  
803 colour experience lacked either veridicality or what has been called “perceptual presence” i.e. they  
804 were not perceived as properties of the world [68]. The majority of both groups provided similar  
805 descriptions about the veridicality of their associated colour experiences, which was compatible with  
806 a lack of perceptual presence (for more detail see supplementary material  
807 [https://osf.io/e367d/?view\\_only=dd61d42daa7a4c848023b89bd38789f8](https://osf.io/e367d/?view_only=dd61d42daa7a4c848023b89bd38789f8)). There were possible  
808 exceptions, but the evidence we have speaks more to the location of concurrent experience rather than  
809 to its continuity with ‘real world’ perception in the sense of perceptual presence. For example, in one  
810 surprisingly expressive example, participant ISL-12 describes their experience as follows: “I would  
811 say that they feel roughly the same, but it might sound stupid, but like tomato is more of a real  
812 colour, but when I think of the green (trained colour) I think of it on a computer screen and it’s a sort  
813 of not a real thing, so it doesn’t feel as natural. When you think of a tomato you think about how the  
814 light hits something, that shape, and that’s part of the colour”. This single quote nicely illustrates how  
815 this participant experiences appear to lack perceptual presence. Further research is needed to examine  
816 if induced or natural synaesthetic experience do indeed lack perceptual presence and what cognitive  
817 and neural underpinnings may explain this aspect of experience compared to normal, non-  
818 synaesthetic perception.

819

820 Another identified experiential category within the NOS group was *functionality*, which describes  
821 whether individuals can use synaesthesia as a beneficial cognitive strategy, or whether the  
822 synaesthetic experience is disruptive (see annotated codebook for further description). As well as the  
823 widely reported cognitive benefits found in natural synaesthesia, such as an enhanced memory [for a  
824 review, see 69], we found that for our participants any benefits co-occurred with detrimental effects,  
825 such as interference effects in daily life between the concurrent experience and inducer.

826

827 In addition, we identified the experiential category *colour-as-a-feature*, which describes a common  
828 report within the NOS group, whereby the colour is understood as a basic, elementary feature of the  
829 inducing stimulus, similar to its shape or the phoneme associated with a given letter. Further research  
830 is required to identify if this is a general feature of GCS.

831

832 The interview also included a detailed exploration of how the phonetics of a grapheme, its outward  
833 appearance or its underlying meaning affected the concurrent experience. For example, some  
834 participants reported that visually distinct forms of a grapheme induced the same colour, as long as  
835 they were members of the same linguistic category, i.e. 'b was blue' for all instances of the letter 'b'  
836 regardless of its font or even when presented in other non-Roman languages (e.g. the letter Б in  
837 Cyrillic). These data could be used to further explore the relative contributions of conceptual  
838 associations or the sensory/perceptual features of a grapheme in the generation of synaesthetic  
839 phenomenology [70,71].

840

841 The phenomenological dimensions identified here display a large degree of overlap with previous  
842 reports of synaesthesia (e.g. 3,11,37). It is therefore likely that these dimensions are typical of a wider  
843 grapheme-colour synaesthesia (GCS) population. However, we acknowledge the conclusions drawn  
844 in our study are limited to our participants and the training regime used [2]. Further work is required  
845 to examine if the identified experiential overlap between induced and naturally occurring

846 synaesthesia apply to a wider population. In addition, we acknowledged that qualitative analysis is  
847 particularly susceptible to researcher bias. We employed a number of strategies to mitigate this  
848 influence, such as the annotated codebooks and intercoder verification. We also provide access to all  
849 interview data as raw transcripts, alongside the annotated codebooks and saturation grids (see  
850 supplementary material [https://osf.io/e367d/?view\\_only=dd61d42daa7a4c848023b89bd38789f8](https://osf.io/e367d/?view_only=dd61d42daa7a4c848023b89bd38789f8))  
851 However, we acknowledge that qualitative research does not reflect an objective, opinion-free point  
852 of view, but we suggest that its strength is in adding a unique level of understanding to a condition  
853 such as synaesthesia, which in turn can be used to drive future experimental work.

854

855 Demographic information from the NOS group revealed that six out of the fifteen participants  
856 worked in mind-science areas (e.g. Psychology, Neuroscience), raising the possibility that they may  
857 have provided theoretically-laden descriptions of their experience. NOS represents a relatively small  
858 subset of the population, with many researchers relying on the same group of synaesthetes across  
859 multiple studies. Future studies should take care to make sure that participants detailed knowledge  
860 of the synaesthesia are not influencing their results, creating a circular confirmation of the condition;  
861 that is, the profile of synaesthesia described in the literature occurs precisely because participants are  
862 aware of normative responses within NOS.

863

864 A potential limitation of our training studies is the possible influence of demand characteristics – i.e.,  
865 the social dynamics present in a researcher-participants relationship, whereby the latter modifies their  
866 behaviour in accordance with what the participants perceive to be the research goal of the study [72].  
867 To guard (as far as possible) against this potential influence, the term ‘synaesthesia’ was not referred  
868 to at any point during the study. The training protocol was always described as a memory training  
869 task. The interview, however, was the first point in the study where a possible connection to  
870 synaesthesia was alluded to by the researcher. Following completion of the study a debriefing email  
871 was sent to all subjects asking if they had become aware of the synaesthesia component of the study

872 at any point (yes/no responses only). 15/18 subjects answered no, indicating that for most participants  
873 demand characteristics were minimal, if present at all. This combined with training induced  
874 behavioural and neurophysiological effects argue against demand characteristics driving responses  
875 during the interview [2]. However, we acknowledge the potential confounding effects of demand  
876 characteristics in driving experience within psychological science, especially for subjects who score  
877 high on scales of hypnotic suggestibility or 'phenomenological control' [73]. Phenomenological  
878 control refers to an individual's ability to alter what they experience, both within and outside of the  
879 hypnotic context, in ways that are consistent with their plans and goals [74,75]. Recent work has  
880 investigated the possible influence of phenomenological control in generating experiences in mirror-  
881 sensory synaesthasias: mirror touch, in which the observation of someone being touched elicits a  
882 reported tactile sensation in the observer [76]; and vicarious pain, in which observed pain elicits  
883 reports of experienced pain [77]. Lush et al., [74] found that hypnotisability scores strongly predicted  
884 mirror-sensory synaesthesia responses, suggesting that some of the experienced touch and pain  
885 sensations may have been the result of the participants' capacity to 'create' the experiences of touch  
886 using phenomenological control. The authors suggest that in the case of mirror-sensory synaesthasias,  
887 individuals may habitually (but involuntarily) implement phenomenological control in everyday life,  
888 when it is in-line with their goals, creating tactile sensations. These findings raise the possibility that  
889 habitual phenomenological control may also underlie the reported colour experiences in both induced  
890 and natural synaesthesia. To address this question, future studies investigating phenomenology  
891 within grapheme-colour synaesthesia should also administer measures of phenomenological control  
892 such as the Sussex-Waterloo Scale of Hypnotisability (SWASH; [78]), to investigate if synaesthetic  
893 phenomenology is related to individual differences in phenomenological control ability.

894

895 Finally, extensions of our approach may be used to advance neurophenomenological accounts of  
896 synaesthesia. For example, first-person data could be used as a heuristic to describe and quantify the  
897 neurodynamics associated with synaesthesia. Indeed, some have already shown how individual

898 differences in synaesthetic phenomenology (localisation) are associated with characteristic neural  
899 responses [79]. It remains an open question to what extent associative training paradigms that lead to  
900 dramatic alterations in phenomenology, such as those described here, can modify structural and  
901 large-scale dynamical features of the human brain.

902

## 903 **4.0 Conclusion**

904

905 We report the results of an in-depth qualitative analysis of a specific form of training-induced  
906 synaesthesia, resulting from extensive and adaptive associative training, in conjunction with an  
907 analysis of responses to a similar analysis performed on naturally occurring grapheme-colour  
908 synaesthetes. We compared commensurate categories for both forms of novel perceptual experience,  
909 identifying 5 main experiential categories that were common across induced and naturally occurring  
910 synaesthetic experience:

911

- 912 1. Stability of colour experience.
- 913 2. Location of colour experience.
- 914 3. Shape of colour experience.
- 915 4. Relative strength of colour experience.
- 916 5. Automaticity of colour experience.

917

918 For these experiential categories only reports relating to the automaticity of colour experience differed  
919 significantly between the two groups, with NOS experiences being described as mostly automatic,  
920 whereas induced ISL experiences were mostly described as being 'wilful'. However, descriptions of  
921 automaticity differed within the ISL and NOS groups depending on the method of questioning used  
922 (open-ended vs. closed-form). Together, these results suggest that as with other experiential

923 categories, this aspect of synaesthetic experience displays a high degree of heterogeneity, which  
924 further varies depending on the method of questioning.

925

926 While many of these experiential categories have been identified elsewhere [3,11,37], previous work  
927 has provided only limited information about the first-person experience of the participant in relation  
928 to each phenomenological category. In contrast, the present study provides an extensive description  
929 of the phenomenology of induced and natural synaesthetic experience, which has revealed a  
930 surprising degree of heterogeneity in the experience, both within and between individuals experience  
931 for all experiential categories. This rich resource can be used as a basis for devising future  
932 investigations.

933

934 Finally, our results extend previous reports of the parallels between induced and natural synaesthetic  
935 experience [1,2]. While we refrain from ascribing a phenomenological equivalence between training-  
936 induced and natural synaesthetic experiences, in combination with our previous findings [1,2], our  
937 results provide strong evidence that intensive and adaptive training of letter-colour associations can  
938 alter conscious perceptual experiences of non-synaesthetes, producing a coordinated set of  
939 synaesthesia-like characteristics, which bear striking similarities to those found in natural  
940 synaesthesia.

941

## 942 **Acknowledgments**

943

944 All authors are grateful to the Dr. Mortimer and Theresa Sackler Foundation, which supports the  
945 Sackler Centre for Consciousness Science. AO acknowledges the European Commission for support  
946 through the ERASMUS+ scholarship. AKS acknowledges additional support from the Canadian  
947 Institute for Advanced Research (CIFAR) via their Azrieli Programme on Brain, Mind, and

948 Consciousness. DB is funded by Wellcome Trust grant 210920/Z/18/Z. We are grateful to Carys  
949 Barnfield, Acer Y. C. Chang, Elena Gelibter and Alex Piletska for assistance with data collection in  
950 Rothen et al. (2018). We would also like to thank Heather M. Iriye for her help with the processing of  
951 the Stroop data for Rothen et al. (2018).

952

## 953 **5.0 References**

- 954 1. Bor D, Rothen N, Schwartzman DJ, Clayton S, Seth AK. Adults can be trained to acquire  
955 synesthetic experiences. *Scientific reports*. 2014 Nov 18;4:7089.
- 956 2. Rothen N, Schwartzman DJ, Bor D, Seth AK. Coordinated neural, behavioral, and  
957 phenomenological changes in perceptual plasticity through overtraining of synesthetic  
958 associations. *Neuropsychologia*. 2018 Mar 1;111:151-62.
- 959 3. Dixon MJ, Smilek D, Cudahy C, Merikle PM. Five plus two equals yellow. *Nature*. 2000  
960 Jul;406(6794):365-.
- 961 4. Meier B, Rothen N. Training grapheme-colour associations produces a synaesthetic Stroop  
962 effect, but not a conditioned synaesthetic response. *Neuropsychologia*. 2009 Mar 1;47(4):1208-  
963 11.
- 964 5. Ward J, Li R, Salih S, Sagiv N. Varieties of grapheme-colour synaesthesia: a new theory of  
965 phenomenological and behavioural differences. *Consciousness and cognition*. 2007 Dec  
966 1;16(4):913-31.
- 967 6. Baron-Cohen S, Burt L, Smith-Laittan F, Harrison J, Bolton P. Synaesthesia: prevalence and  
968 familiarity. *Perception*. 1996 Sep;25(9):1073-9.
- 969 7. Eagleman DM, Kagan AD, Nelson SS, Sagaram D, Sarma AK. A standardized test battery for  
970 the study of synesthesia. *Journal of neuroscience methods*. 2007 Jan 15;159(1):139-45.



- 971 8. Rothen N, Seth AK, Witzel C, Ward J. Diagnosing synaesthesia with online colour pickers:  
972 maximising sensitivity and specificity. *Journal of neuroscience methods*. 2013 Apr  
973 30;215(1):156-60.
- 974 9. Dixon MJ, Smilek D, Merikle PM. Not all synaesthetes are created equal: Projector versus  
975 associator synaesthetes. *Cognitive, Affective, & Behavioral Neuroscience*. 2004 Sep 1;4(3):335-  
976 43.
- 977 10. Rothen N, Tsakanikos E, Meier B, Ward J. Coloured Letters and Numbers (CLaN): a reliable  
978 factor-analysis based synaesthesia questionnaire. *Consciousness and cognition*. 2013 Sep  
979 1;22(3):1047-60.
- 980 11. Simner J. Why are there different types of synesthete?. *Frontiers in Psychology*. 2013 Sep  
981 2;4:558.
- 982 12. Seth AK. A predictive processing theory of sensorimotor contingencies: Explaining the puzzle  
983 of perceptual presence and its absence in synesthesia. *Cognitive neuroscience*. 2014 Apr  
984 3;5(2):97-118.
- 985 13. Rothen N, Meier B. Acquiring synaesthesia: insights from training studies. *Frontiers in*  
986 *human neuroscience*. 2014 Mar 3;8:109.
- 987 14. Kadosh RC, Sagiv N, Linden DE, Robertson LC, Elinger G, Henik A. When blue is larger than  
988 red: Colors influence numerical cognition in synesthesia. *Journal of cognitive neuroscience*.  
989 2005 Nov;17(11):1766-73.
- 990 15. Colizoli O, Murre JM, Rouw R. Pseudo-synesthesia through reading books with colored  
991 letters. *PloS one*. 2012 Jun 27;7(6):e39799.
- 992 16. Rothen N, Wantz AL, Meier B. Training synaesthesia. *Perception*. 2011 Oct;40(10):1248-50.
- 993 17. Kordeš U, Klauser F. Second-person in-depth phenomenological inquiry as an approach for  
994 studying enaction of beliefs. *Interdisciplinary Description of Complex Systems: INDECS*.  
995 2016 Oct 31;14(4):369-77.
- 996 18. Flick U. *An introduction to qualitative analysis*. 2009. London: Sage Publications.

- 997 19. Charmaz K. Constructing grounded theory: A practical guide through qualitative analysis.  
998 sage; 2006 Jan 13.
- 999 20. Barriball KL, While A. Collecting data using a semi-structured interview: a discussion paper.  
1000 Journal of Advanced Nursing-Institutional Subscription. 1994 Feb 1;19(2):328-35.
- 1001 21. Minichiello V, Aroni R, Minichiello V. In-depth interviewing: Researching people. Longman  
1002 Cheshire; 1990.
- 1003 22. Petitmengin C, Remillieux A, Valenzuela-Moguillansky C. Discovering the structures of lived  
1004 experience. Phenomenology and the Cognitive Sciences. 2019 Sep 15;18(4):691-730.
- 1005 23. Valenzuela-Moguillansky C, Vásquez-Rosati A. An analysis procedure for the micro-  
1006 phenomenological interview. Construct. Found. 2019 Mar 1;14:123-56.
- 1007 24. Hsieh HF, Shannon SE. Three approaches to qualitative content analysis. Qualitative health  
1008 research. 2005 Nov;15(9):1277-88.
- 1009 25. Braun, V., & Clarke, V. (2012). Thematic analysis. In H. Cooper, P. M. Camic, D. L. Long, A. T.  
1010 Panter, D. Rindskopf, & K. J. Sher (Eds.), APA handbooks in psychology®. APA handbook of  
1011 research methods in psychology, Vol. 2. Research designs: Quantitative, qualitative,  
1012 neuropsychological, and biological (p. 57–71). American Psychological Association.
- 1013 26. Mills J, Bonner A, Francis K. The development of constructivist grounded theory.  
1014 International journal of qualitative methods. 2006 Mar;5(1):25-35.
- 1015 27. Mills J, Bonner A, Francis K. Adopting a constructivist approach to grounded theory:  
1016 Implications for research design. International journal of nursing practice. 2006 Feb;12(1):8-13.
- 1017 28. Nelson J. Using conceptual depth criteria: addressing the challenge of reaching saturation in  
1018 qualitative research. Qualitative research. 2017 Oct;17(5):554-70.
- 1019 29. Fusch PI, Ness LR. Are we there yet? Data saturation in qualitative research. The qualitative  
1020 report. 2015 Sep 7;20(9):1408.
- 1021 30. O'reilly M, Parker N. 'Unsatisfactory Saturation': a critical exploration of the notion of  
1022 saturated sample sizes in qualitative research. Qualitative research. 2013 Apr;13(2):190-7.

- 1023 31. Kerr C, Nixon A, Wild D. Assessing and demonstrating data saturation in qualitative inquiry  
1024 supporting patient-reported outcomes research. *Expert review of pharmacoeconomics &*  
1025 *outcomes research*. 2010 Jun 1;10(3):269-81.
- 1026 32. Brod M, Tesler LE, Christensen TL. Qualitative research and content validity: developing best  
1027 practices based on science and experience. *Quality of life research*. 2009 Nov 1;18(9):1263.
- 1028 33. Hurlburt RT, Heavey CL. *Exploring inner experience*. Amsterdam: Johns Benjamins. 2006.
- 1029 34. Kordes U, Oblak A, Smrdu M, Demsar E. Ethnography of meditation: An account of pursuing  
1030 meditative practice as a tool for researching consciousness. *Journal of Consciousness Studies*.  
1031 2019 Jan 1;26(7-8):184-237.
- 1032 35. De Wet J, Erasmus Z. Towards rigour in qualitative analysis. *Qualitative Research Journal*.  
1033 2005;5(1):27.
- 1034 36. Edquist J, Rich AN, Brinkman C, Mattingley JB. Do synaesthetic colours act as unique  
1035 features in visual search?. *Cortex*. 2006 Jan 1;42(2):222-31.
- 1036 37. Ward J. Synesthesia. *Annual review of psychology*. 2013 Jan 3;64:49-75.
- 1037 38. Barnett KJ, Finucane C, Asher JE, Bargary G, Corvin AP, Newell FN, Mitchell KJ. Familial  
1038 patterns and the origins of individual differences in synaesthesia. *Cognition*. 2008 Feb  
1039 1;106(2):871-93.
- 1040 39. Meier B, Rothen N, Walter S. Developmental aspects of synaesthesia across the adult lifespan.  
1041 *Frontiers in human neuroscience*. 2014 Mar 11;8:129.
- 1042 40. Simner J, Ward J, Lanz M, Jansari A, Noonan K, Glover L, Oakley DA. Non-random  
1043 associations of graphemes to colours in synaesthetic and non-synaesthetic populations.  
1044 *Cognitive neuropsychology*. 2005 Dec 1;22(8):1069-85.
- 1045 41. Simner J. Why are there different types of synesthete?. *Frontiers in Psychology*. 2013 Sep  
1046 2;4:558.
- 1047 42. Dixon MJ, Smilek D, Merikle PM. Not all synaesthetes are created equal: Projector versus  
1048 associator synaesthetes. *Cognitive, Affective, & Behavioral Neuroscience*. 2004 Sep 1;4(3):335-

- 1049 43. Ward J, Li R, Salih S, Sagiv N. Varieties of grapheme-colour synaesthesia: a new theory of  
1050 phenomenological and behavioural differences. *Consciousness and cognition*. 2007 Dec  
1051 1;16(4):913-31.
- 1052 44. Petitmengin C. The validity of first-person descriptions as authenticity and coherence. *Journal*  
1053 *of Consciousness studies*. 2009 Jan 1;16(10-11):252-84.
- 1054 45. Ratcliffe M. *Feelings of being: Phenomenology, psychiatry and the sense of reality*. Oxford  
1055 University Press; 2008 Jun 26.
- 1056 46. Herz N, Baror S, Bar M. Overarching States of Mind. *Trends in Cognitive Sciences*. 2020 Mar  
1057 1;24(3):184-99.
- 1058 47. Ward J, Li R, Salih S, Sagiv N. Varieties of grapheme-colour synaesthesia: a new theory of  
1059 phenomenological and behavioural differences. *Consciousness and cognition*. 2007 Dec  
1060 1;16(4):913-31.
- 1061 48. Albright TD. On the perception of probable things: neural substrates of associative memory,  
1062 imagery, and perception. *Neuron*. 2012 Apr 26;74(2):227-45.
- 1063 49. Deroy O, Spence C. Why we are not all synesthetes (not even weakly so). *Psychonomic*  
1064 *bulletin & review*. 2013 Aug 1;20(4):643-64.
- 1065 50. Price MC. Spatial forms and mental imagery. *Cortex*. 2009 Nov 1;45(10):1229-45.
- 1066 51. Sikka P, Feilhauer D, Valli K, Revonsuo A. How you measure is what you get: differences in  
1067 self-and external ratings of emotional experiences in home dreams. *American Journal of*  
1068 *Psychology*. 2017 Oct 1;130(3):367-84.
- 1069 52. Nagel J. The meanings of metacognition. *Philosophy and Phenomenological Research*. 2014  
1070 89, 710–718.10.1111/phpr.2014.89.issue-3.
- 1071 53. Mattingley JB, Payne JM, Rich AN. Attentional load attenuates synaesthetic priming effects in  
1072 grapheme-colour synaesthesia. *Cortex*. 2006 Jan 1;42(2):213-21.
- 1073 54. Rich AN, Mattingley JB. The effects of stimulus competition and voluntary attention on  
1074 colour-graphemic synaesthesia. *NeuroReport*. 2003 Oct 6;14(14):1793-8.

- 1075 55. Rothen N, Seth AK, Ward J. Synesthesia improves sensory memory, when perceptual  
1076 awareness is high. *Vision research*. 2018 Dec 1;153:1-6.
- 1077 56. Ward J, Jonas C, Dienes Z, Seth A. Grapheme-colour synaesthesia improves detection of  
1078 embedded shapes, but without pre-attentive 'pop-out' of synaesthetic colour. *Proceedings of*  
1079 *the Royal Society B: Biological Sciences*. 2010 Apr 7;277(1684):1021-6.
- 1080 57. Kosslyn SM, Brunn J, Cave KR, Wallach RW. Individual differences in mental imagery ability:  
1081 A computational analysis. *Cognition*. 1984 Dec 1;18(1-3):195-243.
- 1082 58. Bergmann J, Genç E, Kohler A, Singer W, Pearson J. Smaller primary visual cortex is  
1083 associated with stronger, but less precise mental imagery. *Cerebral cortex*. 2016 Sep  
1084 1;26(9):3838-50.
- 1085 59. Lee SH, Kravitz DJ, Baker CI. Disentangling visual imagery and perception of real-world  
1086 objects. *Neuroimage*. 2012 Feb 15;59(4):4064-73.
- 1087 60. Barnett KJ, Newell FN. Synaesthesia is associated with enhanced, self-rated visual imagery.  
1088 *Consciousness and cognition*. 2008 Sep 1;17(3):1032-9.
- 1089 61. Baron-Cohen S, Wyke MA, Binnie C. Hearing words and seeing colours: an experimental  
1090 investigation of a case of synaesthesia. *Perception*. 1987 Dec;16(6):761-7.
- 1091 62. Simner J. Beyond perception: synaesthesia as a psycholinguistic phenomenon. *Trends in*  
1092 *cognitive sciences*. 2007 Jan 1;11(1):23-9.
- 1093 63. Eagleman DM. The objectification of overlearned sequences: a new view of spatial sequence  
1094 synesthesia. *cortex*. 2009 Nov 1;45(10):1266-77.
- 1095 64. Asher JE, Lamb JA, Brocklebank D, Cazier JB, Maestrini E, Addis L, Sen M, Baron-Cohen S,  
1096 Monaco AP. A whole-genome scan and fine-mapping linkage study of auditory-visual  
1097 synesthesia reveals evidence of linkage to chromosomes 2q24, 5q33, 6p12, and 12p12. *The*  
1098 *American Journal of Human Genetics*. 2009 Feb 13;84(2):279-85.
- 1099 65. Baron-Cohen S, Burt L, Smith-Laittan F, Harrison J, Bolton P. Synaesthesia: prevalence and  
1100 familiarity. *Perception*. 1996 Sep;25(9):1073-9

- 1101 66. Witthoft, N., & Winawer, J. (2006). Synesthetic colors determined by having colored  
1102 refrigerator magnets in childhood. *Cortex*, 42(2), 175-183.
- 1103 67. Witthoft N, Winawer J. Learning, memory, and synesthesia. *Psychological science*. 2013  
1104 Mar;24(3):258-65.
- 1105 68. Seth AK. A predictive processing theory of sensorimotor contingencies: Explaining the puzzle  
1106 of perceptual presence and its absence in synesthesia. *Cognitive neuroscience*. 2014 Apr  
1107 3;5(2):97-118.
- 1108 69. Rothen N, Meier B, Ward J. Enhanced memory ability: insights from synaesthesia.  
1109 *Neuroscience & Biobehavioral Reviews*. 2012 Sep 1;36(8):1952-63.
- 1110 70. Dixon MJ, Smilek D, Duffy PL, Zanna MP, Merikle PM. The role of meaning in grapheme-  
1111 colour synaesthesia. *Cortex*. 2006 Jan 1;42(2):243-52.
- 1112 71. Myles KM, Dixon MJ, Smilek D, Merikle PM. Seeing double: The role of meaning in  
1113 alphanumeric-colour synaesthesia. *Brain and Cognition*. 2003 Nov 1;53(2):342-5.
- 1114 72. Orne MT. Demand characteristics and the concept of quasi-controls. *Artifacts in behavioral*  
1115 *research: Robert Rosenthal and Ralph L. Rosnow's classic books*. 2009 Aug 3;110:110-37.
- 1116 73. Lush P. Demand characteristics confound the rubber hand illusion. *Collabra: Psychology*.  
1117 2020 Mar 11.
- 1118 74. Lush P, Botan V, Scott RB, Seth A, Ward J, Dienes Z. Phenomenological control: response to  
1119 imaginative suggestion predicts measures of mirror touch synaesthesia, vicarious pain and  
1120 the rubber hand illusion.
- 1121 75. Dienes, Z., Lush, P., Palfi, B., Roseboom, W., Scott, R., Seth, A. & Lovell, M. (in press).  
1122 Phenomenological control as cold control. *Psychology of Consciousness*.
- 1123 76. Blakemore, S. J., Bristow, D., Bird, G., Frith, C., & Ward, J. (2005). Somatosensory activations  
1124 during the observation of touch and a case of vision–touch synaesthesia. *Brain*, 128(7), 1571-  
1125 1583.

- 1126 77. Fitzgibbon BM, Giummarra MJ, Georgiou-Karistianis N, Enticott PG, Bradshaw JL. Shared  
1127 pain: from empathy to synaesthesia. *Neuroscience & Biobehavioral Reviews*. 2010 Mar  
1128 1;34(4):500-12.
- 1129 78. Lush P, Moga G, McLatchie N, Dienes Z. The Sussex-Waterloo Scale of Hypnotizability  
1130 (SWASH): measuring capacity for altering conscious experience. *Neuroscience of*  
1131 *consciousness*. 2018;2018(1):niy006.
- 1132 79. van Praag CD, Garfinkel S, Ward J, Bor D, Seth AK. Automaticity and localisation of  
1133 concurrents predicts colour area activity in grapheme-colour synaesthesia.  
1134 *Neuropsychologia*. 2016 Jul 29;88:5-14.
- 1135
